# Supplementary material
Source: Research Square preprint supplement (doi:10.21203/rs.3.rs-10126332/v1)
Supplement: Supplementary file 1 [file 4a5b54c941569290a41aef80.docx]

Highlights

● CeO2-CuO doped bamboo charcoal was prepared

● The Cu(I)/Cu(II)–Ce(III)/Ce(Ⅳ) bimetal redox cycle can effectively activate PMS

● The photocatalysis synergistically cooperates with the redox cycle
