# Supplementary material
Source: Research Square preprint supplement (doi:10.21203/rs.3.rs-10126332/v1)

**Graphical abstract**


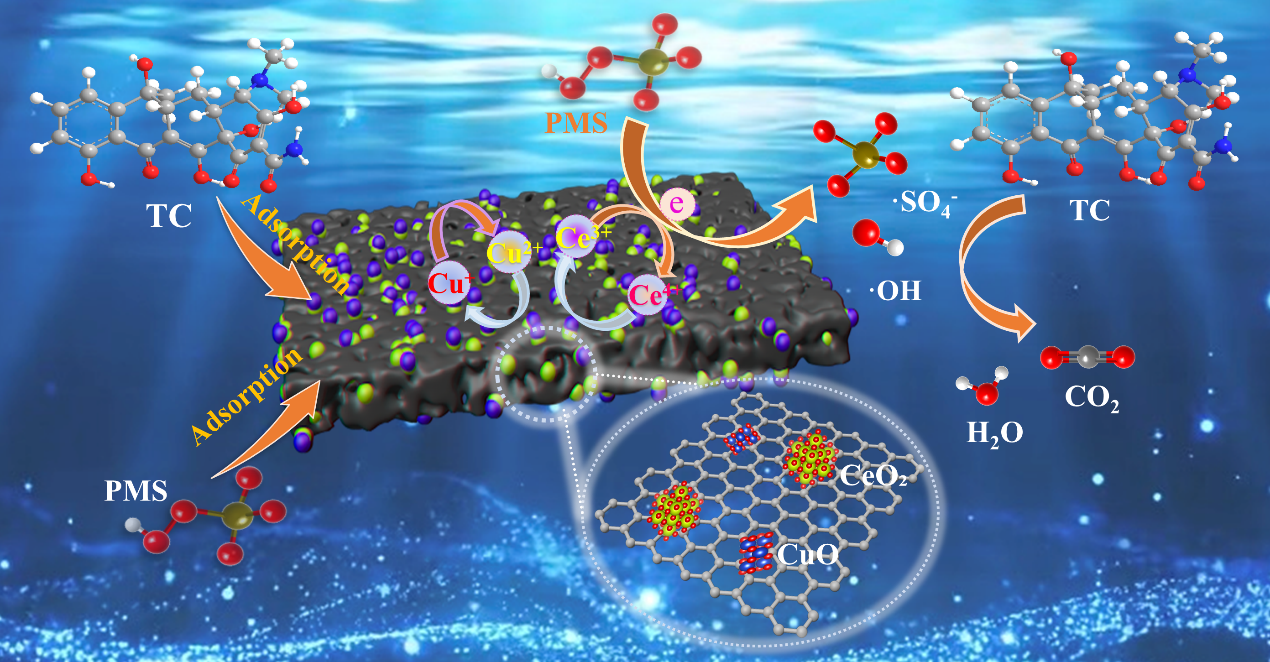

Supplement: Supplementary file 2 [file bfafa2b29d9dcde85411d753.docx]
